# Supplementary material for: Defining the Infant Male Urobiome and Moving Towards Mechanisms in Urobiome Research
Source: Research Square preprint supplement (doi:10.21203/rs.3.rs-2618137/v1), 2023-03-07
Supplement: Supplementary file 1 [file 025eab5795541934e272196f.xlsx]

## Sheet: Sheet1
BioSample	SRA_Accession	SampleID	Description
SAMN33341089	SRS16799825	AS36	whole genome sequencing of A. schaalli AS36
SAMN33341090	SRS16799826	AS50	whole genome sequencing of A. schaalli AS50
SAMN33341091	SRS16799827	AS1050	whole genome sequencing of A. schaalli AS1050
SAMN33341092	SRS16799828	AS1052	whole genome sequencing of A. schaalli AS1052
SAMN33341093	SRS16799829	AS1053	whole genome sequencing of A. schaalli AS1053
SAMN33341094	SRS16799830	AS1054	whole genome sequencing of A. schaalli AS1054
SAMN33341095	SRS16799831	AS1230	whole genome sequencing of A. schaalli AS1230
SAMN33341096	SRS16799832	AS1349	whole genome sequencing of A. schaalli AS1349
SAMN33341097	SRS16799833	AS1351	whole genome sequencing of A. schaalli AS1351
SAMN33342248	SRR23560255	MiSeq_ExtractionBlank1	DNA extraction kit blank
SAMN33342249	SRR23560254	MiSeq_ExtractionBlank2	DNA extraction kit blank
SAMN33342250	SRR23560241	MiSeq_ExtractionBlank3	DNA extraction kit blank
SAMN33342251	SRR23560230	MiSeq_ExtractionBlank4	DNA extraction kit blank
SAMN33342252	SRR23560195	MiSeq_ExtractionBlank5	DNA extraction kit blank
SAMN33342253	SRR23560184	MiSeq_ExtractionBlank6	DNA extraction kit blank
SAMN33342254	SRR23560170	MiSeq_ExtractionBlank7	DNA extraction kit blank
SAMN33342255	SRR23560159	MiSeq_ExtractionBlank8	DNA extraction kit blank
SAMN33342256	SRR23560223	MiSeq_PCRBlank1	16S rRNA PCR amplification blank
SAMN33342257	SRR23560212	MiSeq_PCRBlank2	16S rRNA PCR amplification blank
SAMN33342258	SRR23560253	MiSeq_PCRBlank3	16S rRNA PCR amplification blank
SAMN33342259	SRR23560250	MiSeq_PCRBlank4	16S rRNA PCR amplification blank
SAMN33342260	SRR23560249	MiSeq_ZymoMockA	Zymo Mock Microbial community (undiluted)
SAMN33342261	SRR23560248	MiSeq_ZymoMockB	Zymo Mock Microbial community (1/10 dilution)
SAMN33342262	SRR23560247	MiSeq_ZymoMockC	Zymo Mock Microbial community (1/100 dilution)
SAMN33342263	SRR23560246	MiSeq_ZymoMockD	Zymo Mock Microbial community (1/1000 dilution)
SAMN33342264	SRR23560245	MiSeq_ZymoMockE	Zymo Mock Microbial community (10^-4 dilution)
SAMN33342265	SRR23560244	MiSeq_ZymoMockF	Zymo Mock Microbial community (10^-5 dilution)
SAMN33342266	SRR23560243	MiSeq_ZymoMockG	Zymo Mock Microbial community (10^-6 dilution)
SAMN33342267	SRR23560242	MiSeq_ZymoMockH	Zymo Mock Microbial community (10^-7 dilution)
SAMN33342268	SRR23560240	PatientUrine1	human infant male urine patient 1
SAMN33342269	SRR23560239	PatientUrine2	human infant male urine patient 2
SAMN33342270	SRR23560238	PatientUrine3	human infant male urine patient 3
SAMN33342271	SRR23560237	PatientUrine4	human infant male urine patient 4
SAMN33342272	SRR23560236	PatientUrine5	human infant male urine patient 5
SAMN33342273	SRR23560235	PatientUrine6	human infant male urine patient 6
SAMN33342274	SRR23560234	PatientUrine7	human infant male urine patient 7
SAMN33342275	SRR23560233	PatientUrine8	human infant male urine patient 8
SAMN33342276	SRR23560232	PatientUrine9	human infant male urine patient 9
SAMN33342277	SRR23560231	PatientUrine10	human infant male urine patient 10
SAMN33342278	SRR23560229	PatientUrine11	human infant male urine patient 11
SAMN33342279	SRR23560204	PatientUrine12	human infant male urine patient 12
SAMN33342280	SRR23560203	PatientUrine13	human infant male urine patient 13
SAMN33342281	SRR23560202	PatientUrine14	human infant male urine patient 14
SAMN33342282	SRR23560201	PatientUrine15	human infant male urine patient 15
SAMN33342283	SRR23560200	PatientUrine16	human infant male urine patient 16
SAMN33342284	SRR23560199	PatientUrine17	human infant male urine patient 17
SAMN33342285	SRR23560198	PatientUrine18	human infant male urine patient 18
SAMN33342286	SRR23560197	PatientUrine19	human infant male urine patient 19
SAMN33342287	SRR23560196	PatientUrine20	human infant male urine patient 20
SAMN33342288	SRR23560194	PatientUrine21	human infant male urine patient 21
SAMN33342289	SRR23560193	PatientUrine22	human infant male urine patient 22
SAMN33342290	SRR23560192	PatientUrine23	human infant male urine patient 23
SAMN33342291	SRR23560191	PatientUrine24	human infant male urine patient 24
SAMN33342292	SRR23560190	PatientUrine25	human infant male urine patient 25
SAMN33342293	SRR23560189	PatientUrine26	human infant male urine patient 26
SAMN33342294	SRR23560188	PatientUrine27	human infant male urine patient 27
SAMN33342295	SRR23560187	PatientUrine28	human infant male urine patient 28
SAMN33342296	SRR23560186	PatientUrine29	human infant male urine patient 29
SAMN33342297	SRR23560185	PatientUrine30	human infant male urine patient 30
SAMN33342298	SRR23560183	PatientUrine31	human infant male urine patient 31
SAMN33342299	SRR23560182	PatientUrine32	human infant male urine patient 32
SAMN33342300	SRR23560181	PatientUrine33	human infant male urine patient 33
SAMN33342301	SRR23560177	PatientUrine34	human infant male urine patient 34
SAMN33342302	SRR23560176	PatientUrine35	human infant male urine patient 35
SAMN33342303	SRR23560175	PatientUrine36	human infant male urine patient 36
SAMN33342304	SRR23560174	PatientUrine37	human infant male urine patient 37
SAMN33342305	SRR23560173	PatientUrine38	human infant male urine patient 38
SAMN33342306	SRR23560172	PatientUrine39	human infant male urine patient 39
SAMN33342307	SRR23560171	PatientUrine40	human infant male urine patient 40
SAMN33342308	SRR23560169	PatientUrine41	human infant male urine patient 41
SAMN33342309	SRR23560168	PatientUrine42	human infant male urine patient 42
SAMN33342310	SRR23560167	PatientUrine43	human infant male urine patient 43
SAMN33342311	SRR23560166	PatientUrine44	human infant male urine patient 44
SAMN33342312	SRR23560165	PatientUrine45	human infant male urine patient 45
SAMN33342313	SRR23560164	PatientUrine46	human infant male urine patient 46
SAMN33342314	SRR23560163	PatientUrine47	human infant male urine patient 47
SAMN33342315	SRR23560162	PatientUrine48	human infant male urine patient 48
SAMN33342316	SRR23560161	PatientUrine49	human infant male urine patient 49
SAMN33342317	SRR23560160	PatientUrine50	human infant male urine patient 50
SAMN33342318	SRR23560158	NovaSeq_ExtractionBlank1	DNA extraction kit blank
SAMN33342319	SRR23560157	NovaSeq_ExtractionBlank2	DNA extraction kit blank
SAMN33342320	SRR23560156	NovaSeq_ExtractionBlank3	DNA extraction kit blank
SAMN33342321	SRR23560155	NovaSeq_ExtractionBlank4	DNA extraction kit blank
SAMN33342322	SRR23560154	NovaSeq_ExtractionBlank5	DNA extraction kit blank
SAMN33342323	SRR23560228	NovaSeq_ExtractionBlank6	DNA extraction kit blank
SAMN33342324	SRR23560227	NovaSeq_ExtractionBlank7	DNA extraction kit blank
SAMN33342325	SRR23560226	NovaSeq_ExtractionBlank8	DNA extraction kit blank
SAMN33342326	SRR23560225	NovaSeq_PCRBlank1	16S rRNA PCR amplification blank
SAMN33342327	SRR23560224	NovaSeq_PCRBlank2	16S rRNA PCR amplification blank
SAMN33342328	SRR23560222	NovaSeq_PCRBlank3	16S rRNA PCR amplification blank
SAMN33342329	SRR23560221	NovaSeq_PCRBlank4	16S rRNA PCR amplification blank
SAMN33342330	SRR23560220	NovaSeq_ZymoMockA	Zymo Mock Microbial community (undiluted)
SAMN33342331	SRR23560219	NovaSeq_ZymoMockB	Zymo Mock Microbial community (1/10 dilution)
SAMN33342332	SRR23560218	NovaSeq_ZymoMockC	Zymo Mock Microbial community (1/100 dilution)
SAMN33342333	SRR23560217	NovaSeq_ZymoMockD	Zymo Mock Microbial community (1/1000 dilution)
SAMN33342334	SRR23560216	NovaSeq_ZymoMockE	Zymo Mock Microbial community (10^-4 dilution)
SAMN33342335	SRR23560215	NovaSeq_ZymoMockF	Zymo Mock Microbial community (10^-5 dilution)
SAMN33342336	SRR23560214	NovaSeq_ZymoMockG	Zymo Mock Microbial community (10^-6 dilution)
SAMN33342337	SRR23560213	NovaSeq_ZymoMockH	Zymo Mock Microbial community (10^-7 dilution)
SAMN33342338	SRR23560211	SamplingControl1	Saline replicate 1
SAMN33342339	SRR23560210	SamplingControl2	Saline and catheter replicate 1
SAMN33342340	SRR23560209	SamplingControl3	mineral oil replicate 1
SAMN33342341	SRR23560208	SamplingControl4	Saline replicate 2
SAMN33342342	SRR23560207	SamplingControl5	saline and catheter replicate 2
SAMN33342343	SRR23560206	SamplingControl6	mineral oil replicate 2
SAMN33342344	SRR23560205	SamplingControl7	Saline replicate 3
SAMN33342345	SRR23560180	SamplingControl8	saline and catheter replicate 3
SAMN33342346	SRR23560179	SamplingControl9	mineral oil replicate 3
SAMN33342347	SRR23560178	SamplingControl10	saline replicate 4
SAMN33342348	SRR23560252	SamplingControl11	saline and catheter replicate 4
SAMN33342349	SRR23560251	SamplingControl12	mineral oil replicate 4
