# Supplementary material for: Defining the Infant Male Urobiome and Moving Towards Mechanisms in Urobiome Research
Source: Research Square preprint supplement (doi:10.21203/rs.3.rs-2618137/v1), 2023-03-07
Supplement: Supplementary file 4 [file ce6fd29f83e2d49c1befa17c.docx]

**Supplementary Table S1.**

**Sequenced on Illumina MiSeq (2 x 150bp)**

| **Sample:** | **Non-chimeric merged reads (mean):** |
| --- | --- |
| Extraction Blanks (n=8) | 3271 |
| PCR Blanks (n=4) | 100 |
| Patient Samples (n=50) | 14920 |
| ZymoMockA (100) | 35108 |
| ZymoMockB (10-1) | 23384 |
| ZymoMockC (10-2) | 21965 |
| ZymoMockD (10-3) | 8537 |
| ZymoMockE (10-4) | 3494 |
| ZymoMockF (10-5) | 3900 |
| ZymoMockG (10-6) | 2687 |
| ZymoMockH (10-7) | 3459 |

**Sequenced on Illumina NovaSeq 6000 (2 x 150bp)**

| **Sample:** | **Non-chimeric merged reads (mean):** |
| --- | --- |
| Extraction Blanks (n=8) | 9453 |
| PCR Blanks (n=4) | 14267 |
| Sampling Controls (n=12) | 46837 |
| ZymoMockA (100) | 362956 |
| ZymoMockB (10-1) | 339423 |
| ZymoMockC (10-2) | 167475 |
| ZymoMockD (10-3) | 47993 |
| ZymoMockE (10-4) | 24065 |
| ZymoMockF (10-5) | 1884 |
| ZymoMockG (10-6) | 21866 |
| ZymoMockH (10-7) | 12910 |
